# Supplementary material
Source: publisher site journal article supplement (https://www.dovepress.com/article/supplementary_file/617562/617562%20Supplementary%20Methods.docx)
Supplement: Supplementary file 1 [file 617562%20Supplementary%20Methods.docx]

**Supplementary methods**

**1.scRNA-seq data reanalysis**

**1.1 Data acquisition and preprocessing**

PBMC scRNA-seq raw data (10x Genomics, ~20,000 cells/sample) from 8 Bullous pemphigoid (BP) patients and 8 healthy controls (HC) were downloaded from the GEO database (accession: GSE157194). Cell Ranger v7.1 (10x Genomics) was used to align raw sequencing reads to the hg38 human reference genome, generating a feature-barcode matrix for each sample.

**1.2 Quality control and cell filtering**

Downstream analysis was performed using Seurat v4.3.0. Filtering criteria: (1) number of genes detected per cell (nFeature_RNA) between 200 and 10,000; (2) mitochondrial gene percentage per cell (percent.mt) < 10%; (3) removal of doublets using DoubletFinder v2.0.3 (predicted doublet rate set to 7.5%). Following quality control (200 < nFeature_RNA < 10,000; mitochondrial ratio < 10%), normalization was performed.

**1.3 Normalization and batch correction**

Normalization was performed using SCTransform (Seurat v4.3.0), regressing out confounding effects of sequencing depth (nCount_RNA), mitochondrial gene percentage, and cell cycle scores. Batch correction was performed using Harmony v1.0, correcting for batch effects among individual patients in the PCA embedding space (theta = 2, number of cluster centers = 50). Harmony-corrected embeddings were used for all downstream dimensionality reduction, clustering, and visualization.

**1.4 Clustering and visualization**

Cell clustering was performed using the Louvain algorithm based on a Shared Nearest Neighbor (SNN) graph (k = 20, resolution = 0.5, random seed = 42). Two-dimensional visualization was performed using UMAP (n.neighbors = 30, min.dist = 0.3).

**1.5 Cell type annotation**

A dual annotation strategy of "automated + manual validation" was employed: (1) Automated annotation: SingleR v2.0 was used with reference databases Human Primary Cell Atlas (HPCA) and Blueprint + ENCODE, based on cluster-level expression profiles for annotation; (2) Manual validation: Classic marker genes (CD3D/CD3E for T cells, CD14/MS4A1 for B cells, FCGR3A/CD14 for monocytes, FCER1A/CLEC10A for dendritic cells, GNLY/NKG7 for NK cells) were visualized on UMAP for confirmation, and annotations were manually corrected when necessary. The final annotation identified 15 major immune cell types.

**1.6 Differentially expressed genes (DEGs) analysis**

The Wilcoxon rank-sum test was used to identify differentially expressed genes (DEGs) within each cell type between BP patients and HC. Thresholds were set as: |log₂FC| > 0.25, difference in the proportion of cells expressing the gene (pct.1 vs pct.2) ≥ 0.25, and Bonferroni-corrected adjusted P value < 0.05.

**1.7 Transcriptional network analysis**

pySCENIC v0.12.1 (command-line version) was used to identify cell type-specific transcriptional regulatory modules (regulons). The cisTarget database corresponding to the hg38 reference genome was used, and AUCell scores were binarized using default thresholds. If the activity score of a regulon in a specific cell type was significantly higher than in other cell types (AUC rank-sum test, adjusted P < 0.05), the regulon was defined as a functional regulatory feature of that cell type.

Integration of MR genes with scRNA-seq For candidate genes corresponding to significant immune phenotypes identified by MR analysis (e.g., FCGR3A, SELL), we examined their expression differences between BP and HC in the scRNA-seq data, and further analyzed ligand-receptor interaction changes among related cell types using CellChat v1.6.0.

**2 Bullous pemphigoid-like mice experiment**

**2.1 Experimental animals and ethical approval**

Our utilized 8–10-week-old female C57BL/6J mice generated by Beijing Biocytogen Co., Ltd.; these were NC16A knockout mice engineered to express the human NC16A gene. They were housed in SPF animal facilities with a 12-hour light/dark cycle and free access to food and water. All animal experiments were approved by the Animal Ethics Committee of Yunnan Minzu University (approval number: YMU-AFEC-2023-A020).

**2.2 Randomization schem**

After genotype identification, 10 NC16A+/+ homozygous mice were randomly assigned to 2 groups using a computer-generated random number table: (1) NC16A+/+ BP group (injected with anti-BP180 IgG); (2) NC16A+/+ NC group (injected with control IgG antibody). Additionally, 5 wild-type C57BL/6J mice were randomly matched as the NC control group (injected with an equal volume of PBS).

**2.3 NC16A+/+ BP model establishment**

The three groups received subcutaneous injections of BP180 antibody or control IgG antibody (50 μg) on days D1, D3, D5, and D7, while the NC group received an equal volume of PBS. On D8, samples were collected for skin HE staining, immunofluorescence, and peripheral blood flow cytometry.

**2.4 Tissue HE staining**

Epidermal tissues were fixed in 4% paraformaldehyde in PBS, embedded in paraffin, sectioned, and stained with H&E for histopathological examination. Images were captured using an Olympus BX600 microscope.

**2.5 Immunofluorescence detection**

Mouse skin tissues were embedded in OCT compound, sectioned with a cryostat into 0.5-μm-thick sections, stained with IgG antibody (Proteintech, catalog number: CL488-10284-100ul) and C3/C3c antibody (GeneTex, catalog number: GTX73472) for 30 minutes, and fluorescence signals were visualized using a fluorescence microscope.

**2.6 Flow cytometry analysis**

All flow cytometry antibodies were purchased from BioLegend, specifically including: APC anti-mouse CD16/32 (101325), PE anti-mouse CD14 (150105), FITC anti-mouse/human CD11b (101205), PE/Cyanine5 anti-mouse Ly-6G/Ly-6C (Gr-1) (108409). Data acquisition was performed using a C6 PLUS flow cytometer (BD Biosciences, USA), and imaging was conducted with a DM1000 microscope (Leica, Germany). Peripheral blood mononuclear cells (PBMC) were isolated from mice using density gradient centrifugation. After resuspension in 2% FBS-PBS and washing once by centrifugation at 1500 rpm for 5 min, the cell concentration was adjusted to 1×10⁶ cells/100 μL, and 100 μL was aliquoted per flow tube. Following supernatant removal, APC-labeled anti-CD16 and PE-labeled anti-CD14 antibodies were added. The samples were vortexed to mix and incubated at room temperature for 15 min to perform extracellular staining; subsequently, 800μL of Cell Staining Buffer was added, and the cells were centrifuged at 1200 × g (calculated based on a radius of 3.5 cm) for 5 min. After discarding the supernatant, FITC-labeled anti-CD11b antibody and PE/Cyanine5-labeled anti-Gr-1 antibody were added and incubated at 4°C for 45 min to complete staining; finally, 500μL of Staining Buffer was added, and the samples were run on the machine. M-MDSCs were identified and their proportion calculated by gating on CD11b+Gr-1low; within the CD11b+Gr-1low monocyte gate, further gating was performed on CD14- to analyze the expression level of CD16/32 (CD16) in this subpopulation. Finally, the distribution of murine M-MDSCs and CD16 expression profiles within the CD14−CD16+ subpopulation were visualized using two-parameter dot plots.
